# Supplementary material
Source: Springer Nature journal article supplement (https://www.springermedizin.de/resource/supplementary/12882_2014_830_MOESM2_ESM.pdf/9454398)
Supplement: MOESM2 [file 9454398]

## **Clinical Coordinating Center**

*Montreal Children's Hospital,  
McGill University (Foster)*

## **Data Coordinating Center**

*Children's Hospital of Philadelphia (Furth)*

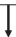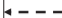

## **Psychology Team**

*Psychologist 1*

*Psychologist 2*

*Psychologist 3*

Cincinnati Children's  
Hospital Medical Center

Montreal Children's  
Hospital, McGill University

Children's Hospital of  
Philadelphia, University of  
Pennsylvania

Seattle Children's  
Hospital, University of  
Washington

B.C. Children's Hospital,  
University of British  
Columbia

St. Louis Children's  
Hospital, Washington  
University

Hospital for Sick  
Children, University of  
Toronto

Centre Hospitalier  
Universitaire Ste. Justine,  
University of Montreal
